# Supplementary material for: Shenling Baizhu Powder Inhibits RV-SA11-Induced Inflammation and Rotavirus Enteritis via TLR4/MyD88/NF-κB Signaling Pathway
Source: PubMed Central journal article supplement (PMC8062900; doi:10.3389/fphar.2021.642685), 2021-04-09
Supplement: datasheet1.pdf [file datasheet1.pdf]

*Supplementary Material*

Table 1 Determination of virulence of RV-SA11 strain (n=3)

| Concentration of virus | 0    | 10 <sup>-10</sup> | 10 <sup>-9</sup> | 10 <sup>-8</sup> | 10 <sup>-7</sup> | 10 <sup>-6</sup> | 10 <sup>-5</sup> | 10 <sup>-4</sup> | 10 <sup>-3</sup> | 10 <sup>-2</sup> | 10 <sup>-1</sup> |
|------------------------|------|-------------------|------------------|------------------|------------------|------------------|------------------|------------------|------------------|------------------|------------------|
| Average absorbance     | 1.37 | 1.22              | 1.18             | 1.32             | 1.13             | 1.05             | 0.82             | 0.72             | 0.61             | 0.57             | 0.45             |
| Cell viability         | 1    | 0.81              | 0.78             | 0.88             | 0.75             | 0.70             | 0.55             | 0.48             | 0.41             | 0.38             | 0.30             |
| Cytopathic rate        | 0    | 0.19              | 0.22             | 0.12             | 0.25             | 0.30             | 0.45             | 0.52             | 0.59             | 0.62             | 0.70             |

Table 2 The chemical constituents of SBP-containing serum identified by UPLC-Q-Orbitrap HRMS

| Number | Name                                                                     | Formula      | Molecular Weight | RT (min) |
|--------|--------------------------------------------------------------------------|--------------|------------------|----------|
| 1      | N1-(1,3,5-Trimethyl-1H-pyrazol-4-yl)-2-cyano-3-(dimethylamino)acrylamide | C12 H17 N5 O | 247.14212        | 1.318    |
| 2      | Isoliquiritigenin                                                        | C15 H12 O4   | 256.07323        | 12.036   |
| 3      | 2-Methoxyestrone                                                         | C19 H24 O3   | 300.17024        | 17.915   |
| 4      | 6-O-Pentopyranosyl-1-O-[(2,6,6-trimethyl-1-cyclohexen-1-yl)carbonyl]-β-  | C21 H34 O11  | 526.22263        | 18.218   |
| 5      | Oleanolic acid                                                           | C30 H48 O3   | 438.34975        | 19.468   |
| 6      | Monoolein                                                                | C21 H40 O4   | 356.29247        | 20.026   |
| 7      | 18-β-Glycyrrhetic acid                                                   | C30 H46 O4   | 470.3394         | 21.032   |
| 8      | 9(Z),11(E)-Conjugated Linoleic Acid                                      | C18 H32 O2   | 280.24           | 21.869   |
| 9      | Oleic acid                                                               | C18 H34 O2   | 282.25585        | 23.275   |

Table 3 The effects of drug - containing serum on the Cell viability of Caco-2 cells (%) (n=3)

| drug-containing serum% | SBP         | ribavirin   |
|------------------------|-------------|-------------|
| 50                     | 65.29±9.51  | 63.25±12.43 |
| 40                     | 73.85±4.38  | 72.48±5.28  |
| 30                     | 80.56±11.56 | 79.21±9.84  |
| 20                     | 90.13±9.34  | 90.43±9.11  |
| 10                     | 102.8±7.85  | 103.32±6.58 |
| 5                      | 99.74±7.89  | 97.96±10.13 |
| 2.5                    | 96.36±6.22  | 96.3±5.25   |

Table 4 The inhibitory effects of drug - containing serum on the RV SA11 in Caco-2 cells (%) (n=3)

| drug-containing serum% | SBP        | ribavirin  |
|------------------------|------------|------------|
| 40                     | 68.52±3.06 | 82.36±7.85 |
| 30                     | 80.82±5.67 | 91.53±4.31 |
| 20                     | 73.3±3.32  | 78.39±7.86 |
| 10                     | 63.85±3.62 | 72.04±4.97 |
| 5                      | 48.34±4.56 | 57.54±6.60 |
| 2.5                    | 34.37±2.74 | 39.52±6.82 |

Table 5 The protein expressions of TLR4, MyD88 and NF - κ B p65 (n=3)

| Group     | TLR4                      | MyD88                     | NF - κ B p65              |
|-----------|---------------------------|---------------------------|---------------------------|
| NC        | 0.0275±0.003              | 0.019±0.005               | 0.088±0.006               |
| RV        | 0.738±0.041 <sup>##</sup> | 0.652±0.024 <sup>##</sup> | 0.655±0.038 <sup>##</sup> |
| ribavirin | 0.405±0.030 <sup>**</sup> | 0.421±0.034 <sup>**</sup> | 0.296±0.012 <sup>**</sup> |
| SBP       | 0.452±0.013 <sup>**</sup> | 0.480±0.020 <sup>**</sup> | 0.261±0.016 <sup>**</sup> |

<sup>##</sup> P < 0.01 vs. NC group; \* P < 0.05, \*\* P < 0.01 vs. RV group.

Table 6 The mRNA expressions of TLR4, MyD88, and NF-κB p65 (n=3)

| Group     | TLR4                      | MyD88                     | NF-κB P65                 |
|-----------|---------------------------|---------------------------|---------------------------|
| NC        | 1                         | 1                         | 1                         |
| RV        | 3.678±0.665 <sup>##</sup> | 4.015±0.25 <sup>##</sup>  | 2.534±0.096 <sup>##</sup> |
| ribavirin | 1.785±0.191 <sup>**</sup> | 1.816±0.131 <sup>**</sup> | 1.556±0.076 <sup>**</sup> |
| SBP       | 2.054±0.135 <sup>**</sup> | 1.510±0.144 <sup>**</sup> | 1.438±0.108 <sup>**</sup> |

<sup>##</sup> P < 0.01 vs. NC group; \* P < 0.05, \*\* P < 0.01 vs. RV group.

Table 7 The expression of cytokines (pg/ml) (n=3)

| Group     | IL-1β                      | IL-6                     | TNF-α                      | IFN-β                    |
|-----------|----------------------------|--------------------------|----------------------------|--------------------------|
| NC        | 125.07±8.42                | 37.71±3.90               | 250.09±13.36               | 26.08±3.64               |
| RV        | 228.43±14.70 <sup>##</sup> | 83.88±7.91 <sup>##</sup> | 446.17±12.22 <sup>##</sup> | 43.87±3.73 <sup>##</sup> |
| ribavirin | 166.06±8.32 <sup>**</sup>  | 67.35±7.18 <sup>*</sup>  | 292.34±11.91 <sup>**</sup> | 52.74±4.60 <sup>*</sup>  |
| SBP       | 172.89±8.59 <sup>**</sup>  | 53.47±9.15 <sup>**</sup> | 308.38±16.63 <sup>**</sup> | 61.61±3.11 <sup>**</sup> |

<sup>##</sup> P < 0.01 vs. NC group; \* P < 0.05, \*\* P < 0.01 vs. RV group.
